# Supplementary material for: Telephone-Assisted Self-Help for Caregivers of Adolescents with Attention-Deficit/Hyperactivity Disorder: An Observational Proof-of-Concept Study
Source: Springer Nature journal article supplement (doi:10.1007/s10826-024-02831-0), 2024-04-08
Supplement: MOESM1 [file 26958178]

Supplementary Information to the Article:

Christina Dose, Tina Roschmann, Claudia Kinnen, Christiane Rademacher, Christopher Hautmann & Manfred Döpfner

**Telephone-Assisted Self-Help for Caregivers of Adolescents with Attention-Deficit/Hyperactivity Disorder: An Observational Proof-of-Concept Study**

### **Correspondence**

Christina Dose, Faculty of Medicine and University Hospital Cologne, School for Child and Adolescent Cognitive Behavior Therapy (AKiP), University of Cologne, Pohligstr. 9, 50969, Cologne, Germany.

Christina.dose@uk-koeln.de

Table S1

*Parent Satisfaction with TASH Program Rated on Client Satisfaction Questionnaire*

| Question                                                  | Completing families/<br>Per-protocol sample ( <i>n</i> = 28) |           |       |     | Non-completing families/<br>Drop-out sample ( <i>n</i> = 11) |           |       |     |
|-----------------------------------------------------------|--------------------------------------------------------------|-----------|-------|-----|--------------------------------------------------------------|-----------|-------|-----|
|                                                           | <i>M</i>                                                     | <i>SD</i> | Range | %   | <i>M</i>                                                     | <i>SD</i> | Range | %   |
|                                                           | Satisfied                                                    |           |       |     | Satisfied                                                    |           |       |     |
| Quality of the program                                    | 6.39                                                         | 0.74      | 4–7   | 96  | 6.00                                                         | 1.10      | 4–7   | 91  |
| Support received as expected                              | 6.07                                                         | 1.02      | 4–7   | 93  | 5.27                                                         | 1.49      | 3–7   | 73  |
| Program met child's needs                                 | 5.64                                                         | 1.13      | 3–7   | 89  | 4.18                                                         | 1.33      | 2–7   | 36  |
| Program met own needs                                     | 5.71                                                         | 1.05      | 3–7   | 93  | 4.27                                                         | 1.74      | 2–7   | 46  |
| Amount of help received                                   | 6.29                                                         | 0.85      | 5–7   | 100 | 6.18                                                         | 0.87      | 5–7   | 100 |
| Dealing more effectively with child's behavior            | 6.29                                                         | 0.76      | 5–7   | 100 | 4.82                                                         | 1.60      | 3–7   | 64  |
| Dealing more effectively with family problems             | 5.61                                                         | 1.03      | 3–7   | 93  | 4.64                                                         | 1.36      | 3–7   | 55  |
| Improvement of partnership <sup>a</sup>                   | 4.22                                                         | 1.73      | 1–7   | 44  | 3.13                                                         | 1.55      | 1–5   | 25  |
| Overall satisfaction with the program                     | 6.32                                                         | 0.77      | 5–7   | 100 | 5.70                                                         | 1.06      | 4–7   | 90  |
| Coming back to program in case of seeking help again      | 6.50                                                         | 0.84      | 5–7   | 100 | 6.18                                                         | 1.33      | 3–7   | 91  |
| Newly developed skills applicable to other family members | 6.46                                                         | 0.95      | 4–7   | 92  | 4.70                                                         | 2.41      | 1–7   | 60  |
| Child's current behavior                                  | 5.68                                                         | 1.47      | 1–7   | 89  | 4.40                                                         | 2.01      | 1–7   | 60  |
| Satisfaction with child's progress                        | 5.39                                                         | 1.26      | 2–7   | 89  | 4.70                                                         | 2.00      | 1–7   | 60  |
| Total score                                               | 5.90                                                         | 0.68      | 4.36– |     | 4.96                                                         | 0.98      | 3.77– |     |
|                                                           |                                                              |           | 7.00  |     |                                                              |           | 6.69  |     |

*Note.* *n* = sample size, *M* = mean (items rated on a 7-point Likert scale ranging from 1 to 7); *SD* = standard

deviation; % satisfied = percentage of parents reporting satisfaction with the intervention (rating  $\geq 5$ ; i.e., “rather good to very good”).

<sup>a</sup> *n* = 23.

Table S2

*Physician Satisfaction with TASH Program*

| Question                                                                       | Completing families/<br>Per-protocol sample ( <i>n</i> = 24) |          |           |               |                | Non-completing families/<br>Drop-out sample ( <i>n</i> = 12) |          |           |               |                |
|--------------------------------------------------------------------------------|--------------------------------------------------------------|----------|-----------|---------------|----------------|--------------------------------------------------------------|----------|-----------|---------------|----------------|
|                                                                                | <i>n</i>                                                     | <i>M</i> | <i>SD</i> | Range         | %<br>satisfied | <i>n</i>                                                     | <i>M</i> | <i>SD</i> | Range         | %<br>satisfied |
| Treatment success within the referred family                                   |                                                              |          |           |               |                |                                                              |          |           |               |                |
| Reduced burden within the family since beginning of the intervention           | 21                                                           | 2.48     | 0.81      | 1–4           | 57             | 10                                                           | 2.10     | 0.57      | 1–3           | 20             |
| Child symptom reduction since the beginning of the intervention                | 21                                                           | 1.95     | 0.87      | 1–4           | 24             | 10                                                           | 2.00     | 0.82      | 1–3           | 30             |
| Improvement of medication compliance since beginning of the intervention       | 19                                                           | 1.84     | 1.07      | 1–4           | 26             | 10                                                           | 2.30     | 0.95      | 1–4           | 40             |
| Reduced burden for own practice with the referred family                       | 23                                                           | 3.26     | 0.86      | 1–4           | 83             | 10                                                           | 2.40     | 0.97      | 1–4           | 30             |
| Overall satisfaction with the program                                          |                                                              |          |           |               |                |                                                              |          |           |               |                |
| Overall satisfaction with the program                                          | 23                                                           | 3.30     | 0.64      | 2–4           | 91             | 11                                                           | 2.91     | 0.83      | 2–4           | 64             |
| Quality of the program                                                         | 23                                                           | 3.43     | 0.59      | 2–4           | 96             | 11                                                           | 3.27     | 0.91      | 2–4           | 73             |
| Advance information about the program sufficient                               | 24                                                           | 3.25     | 0.94      | 1–4           | 83             | 11                                                           | 3.00     | 1.10      | 1–4           | 82             |
| Information about the treatment process (of a family) sufficient               | 24                                                           | 3.04     | 0.81      | 2–4           | 71             | 12                                                           | 2.58     | 0.90      | 1–4           | 67             |
| Information about the treatment process (of a family) helpful for own practice | 23                                                           | 2.91     | 0.79      | 2–4           | 65             | 11                                                           | 2.09     | 0.94      | 1–3           | 46             |
| Wish for continuation of the program for further referral of families          | 24                                                           | 3.50     | 0.83      | 1–4           | 88             | 11                                                           | 3.18     | 0.75      | 2–4           | 82             |
| Total                                                                          | 23                                                           | 3.26     | 0.52      | 2.50–<br>4.00 |                | 10                                                           | 2.91     | 0.64      | 1.50–<br>3.67 |                |

*Note.* *n* = sample size, *M* = mean (items rated on a 4-point Likert scale ranging from 1 to 4); *SD* = standard deviation; % satisfied = percentage of physicians reporting satisfaction with the intervention (rating  $\geq 3$ , i.e. “largely satisfied to particularly satisfied”).

Table S3

*Clinical Significance of the Changes during the Telephone-Assisted Self-Help Intervention for Parents of Adolescents with ADHD (Per-Protocol Sample)*

| Measure  | Sample                                                        | N  | Improved and in<br>a normal range<br><i>n</i> (%) | Improved and in<br>a clinical range<br><i>n</i> (%) | Unchanged and<br>in a normal<br>range<br><i>n</i> (%) | Unchanged and<br>in a clinical<br>range<br><i>n</i> (%) | Worsened<br><i>n</i> (%) |
|----------|---------------------------------------------------------------|----|---------------------------------------------------|-----------------------------------------------------|-------------------------------------------------------|---------------------------------------------------------|--------------------------|
| FBB-ADHS | Total per-protocol sample                                     | 43 | 13 (30)                                           | 3 (7)                                               | 15 (35)                                               | 12 (28)                                                 | 0 (0)                    |
|          | Participants with symptoms in<br>a clinical range at baseline | 29 | 13 (45)                                           | 3 (10)                                              | 2 (7)                                                 | 11 (38)                                                 | 0 (0)                    |
| FBB-SSV  | Total per-protocol sample                                     | 43 | 11 (26)                                           | 3 (7)                                               | 14 (33)                                               | 13 (30)                                                 | 2 (5)                    |
| ODD      | Participants with symptoms in<br>a clinical range at baseline | 26 | 6 (23)                                            | 3 (12)                                              | 3 (12)                                                | 13 (50)                                                 | 1 (4)                    |
| SDQ      | Total per-protocol sample                                     | 43 | 12 (28)                                           | 2 (5)                                               | 14 (33)                                               | 15 (35)                                                 | 0 (0)                    |
|          | Participants with symptoms in<br>a clinical range at baseline | 32 | 11 (34)                                           | 2 (6)                                               | 5 (16)                                                | 14 (44)                                                 | 0 (0)                    |
| KINDL    | Total per-protocol sample                                     | 43 | 10 (23)                                           | 5 (12)                                              | 15 (35)                                               | 12 (28)                                                 | 1 (2)                    |
|          | Participants with symptoms in<br>a clinical range at baseline | 31 | 8 (26)                                            | 5 (16)                                              | 5 (16)                                                | 12 (39)                                                 | 1 (3)                    |

*Note.* *n* = sample size; FBB-ADHS = Symptom Checklist for Attention-Deficit/Hyperactivity Disorder, FBB-SSV = Symptom Checklist for Disruptive Behavior Disorders, SDQ = Strengths and Difficulties Questionnaire, KINDL = German questionnaire on health-related quality of life. Improved and in a normal range: reliable change index (RCI) indicates reliable improvement and normative comparisons at post-assessment indicate normal functioning (for the FBB-ADHS and FBB-SSV, defined as an age- and gender-adjusted Stanine value < 8; for the SDQ, defined as a total mean score ≤ 0.80; for the KINDL, defined as values larger than one standard deviation below the age- and sex-specific mean of a norm sample); improved and in a clinical range: RCI indicates reliable improvement and

normative comparisons at post-assessment indicate symptoms/impairments in quality of life in the clinical range; unchanged and in a normal range: RCI indicates no reliable change and normative comparisons at post-assessment indicate normal functioning; unchanged and in a clinical range: RCI indicates no reliable change and normative comparisons at post-assessment indicate symptoms/impairments in quality of life in the clinical range; worsened: RCI indicates reliable deterioration.

Table S4

*Mean Scores at Baseline and 12 Months and T-Test Results for Comparisons between Baseline and Post-Assessment Scores (Intention-to-Treat Sample)*

| Measure                   | Baseline<br><i>M (SD)</i> | 12 months<br><i>M (SD)</i> | <i>t</i> | <i>df</i> | <i>p</i> | $\alpha'$ | <i>d</i> | 95% CI for <i>d</i> |
|---------------------------|---------------------------|----------------------------|----------|-----------|----------|-----------|----------|---------------------|
| <b>FBB-ADHS</b>           |                           |                            |          |           |          |           |          |                     |
| Inattention               | 1.99 (0.79)               | 1.40 (0.89)                | 3.03*    | 16        | .008     | .050      | 0.70     | [0.37, 1.05]        |
| Hyperactivity/Impulsivity | 1.21 (0.65)               | 0.93 (0.63)                | 2.97*    | 43        | .005     | .025      | 0.43     | [0.17, 0.68]        |
| Total symptom score       | 1.56 (0.49)               | 1.14 (0.51)                | 4.15*    | 13        | .001     | .050      | 0.84     | [0.42, 1.25]        |
| FBB-SSV – ODD             | 1.49 (0.73)               | 1.02 (1.16)                | 2.17     | 11        | .053     | .050      | 0.56     | [0.21, 0.90]        |
| Functional impairment     | 1.54 (0.44)               | 1.29 (0.61)                | 2.59*    | 72        | .012     | .050      | 0.49     | [0.16, 0.85]        |
| FSW                       | 1.76 (0.49)               | 1.89 (0.46)                | -1.68    | 96        | .096     | .050      | -0.28    | [-0.58, 0.01]       |
| <b>SDQ</b>                |                           |                            |          |           |          |           |          |                     |
| Hyperactivity             | 1.36 (0.39)               | 1.10 (0.45)                | 3.26*    | 21        | .004     | .017      | 0.58     | [0.27, 0.94]        |
| Emotional symptoms        | 0.79 (0.50)               | 0.58 (0.49)                | 2.94*    | 453       | .003     | .013      | 0.42     | [0.15, 0.69]        |
| Conduct problems          | 0.89 (0.41)               | 0.65 (0.42)                | 4.05*    | 174       | < .001   | .010      | 0.58     | [0.32, 0.86]        |
| Peer problems             | 0.75 (0.49)               | 0.58 (0.49)                | 2.02     | 21        | .056     | .025      | 0.35     | [0.07, 0.63]        |
| Prosocial behavior        | 1.31 (0.43)               | 1.37 (0.45)                | -0.96    | 311       | .337     | .050      | -0.15    | [-0.43, 0.13]       |
| Total difficulties score  | 0.95 (0.28)               | 0.72 (0.31)                | 5.01*    | 333       | < .001   | .050      | 0.76     | [0.48, 1.06]        |
| KINDL total score         | 3.34 (0.45)               | 3.62 (0.49)                | -3.35*   | 33        | .002     | .050      | -0.59    | [-0.89, -0.27]      |

*Note.* Sample size  $n = 66$ . The degrees of freedom vary as the computations are based on a data set in which missing values were imputed by the use of multiple imputation (for further information, see Heymans & Eekhout, 2019).

FBB-ADHS = Symptom Checklist for Attention-Deficit/Hyperactivity Disorder, FBB-SSV = Symptom Checklist for Disruptive Behavior Disorders, FSW = Parenting Self-Efficacy Questionnaire, SDQ = Strengths and Difficulties Questionnaire, KINDL = German questionnaire on health-related quality of life. *M* = mean, *SD* = standard deviation, *t* = empirical *t*-value, *df* = degrees of freedom, *p* = significance value,  $\alpha'$  = significance level corrected by Bonferroni-Holm procedure, *d* = Cohen's *d* (effect size).

\* significant at Bonferroni-corrected  $\alpha'$  (global significance level:  $\alpha = .05$ ).

## References

Heymans, M. W., & Eekhout, I. (2019). *Applied missing data analysis with SPSS and R(Studio)*

(First draft 20-1-2019). <https://bookdown.org/mwheyman/bookmi/>
